# Supplementary material for: Photoanode driven photoelectrocatalytic system for CO2 reduction to formic acid based on lattice-dislocated Bi nanosheets cathode
Source: Royal Society of Chemistry journal article supplement (doi:10.1039/d3nj05488h), 2024-01-01
Supplement: d3nj05488h1.pdf [file d3nj05488h1.pdf]

1 **Photoanode driven photoelectrocatalytic system for CO<sub>2</sub>**  
2 **reduction to formic acid based on lattice-dislocated Bi**  
3 **nanosheets cathode**

4 Weijie Cheng<sup>a</sup>, Yuhong Wang<sup>a,\*</sup>, Shaoqing Guo<sup>a,\*</sup>, Qingqing Cheng<sup>a</sup>, honghong  
5 Zhao<sup>b\*</sup>, Lizhen Gao<sup>c,d</sup>

6 <sup>a</sup>College of Environment and Resource, Taiyuan University of Science and  
7 Technology, Taiyuan 030024, P. R. China.

8 E-mail: wangyuhong@tyust.edu.cn

9 <sup>b</sup>School of Materials Science and Engineering, North University of China, Taiyuan  
10 030051, PR China

11 <sup>c</sup>College of Chemistry and Chemical Engineering, Shanxi University, Taiyuan 030006,  
12 P. R. China.

13 <sup>d</sup>School of Mechanical Engineering, University of Western Australia, 35 Stirling  
14 Highway, WA 6009, Australia.

15 **Keywords:** CO<sub>2</sub> reduction, HCOOH, C<sub>x</sub>N<sub>y</sub>/BiVO<sub>4</sub>, Lattice-dislocated Bi, wide  
16 potential window

17

18

19

20

21

22

1

## 2 **Formula to calculation**

### 3 **Faradaic Efficiency (FE)<sup>1</sup>**

4 Faraday efficiency has become an important evaluation parameter for ERC-  
5 HCOOH, which can be understood as the ratio between transferred the charge amount  
6 generating a product and the total amount of charge transferred through the circuit,  
7 directly reflecting the selectivity of the electrocatalyst to a target product.

8 For the liquid product:

$$FE = \frac{\alpha n F}{Q}$$

9  
10  $\alpha$  is the quantity of electrons transferred to form the liquid product; n is the  
11 quantity of moles for the liquid product; F is the Faraday constant (96485 C mol<sup>-1</sup>)  
12 and Q is the total number of the charge consumed during the reaction.

13 For gas product:

$$FE = \frac{Q_{gas}}{Q} = \frac{v \times y \times \alpha \times F \times P_0}{j \times R \times T_0}$$

14  
15  $v$  represents the flow rate of CO<sub>2</sub>;  $y$  is the measured concentration of the gas  
16 product in 1mL sample loop based on the calibration of the GC with a standard gas;  $\alpha$   
17 is the number of electrons required to form a molecule of the gas product; F is the  
18 Faraday constant (96485 C mol<sup>-1</sup>);  $P_0$  is the standard atmosphere; R is the universal  
19 gas constant (8.314 J Mol<sup>-1</sup> K<sup>-1</sup>);  $T_0$  is the absolute temperature; and  $j$  is the total  
20 current.

### 21 **Mott-Schottky (MS)<sup>2</sup>**

22 On the condition that a frequency of 1000 Hz and amplitude of 30 mV, the

1 Mott-Schottky plots of BiVO<sub>4</sub> and C<sub>x</sub>N<sub>y</sub>/BiVO<sub>4</sub> photoanode were recorded in a 0.01  
2 M PBS (pH 7.4) under the dark condition.

3 From the intercept of these Mott-Schottky curves, flat band potential are  
4 calculated for all the samples using Equation:

$$5 \quad \frac{1}{C^2} = 2 / (e \epsilon \epsilon_0 N_d A^2) \cdot (E_{app} - E_{FB} - kT/e)$$

6 Where C is the capacitance at the semiconductor/electrolyte interface, F·cm<sup>-2</sup>; e  
7 is elementary charges, 1.60×10<sup>-19</sup> C; ε is the relative dielectric constant, 68 for BiVO<sub>4</sub>;  
8 ε<sub>0</sub> is the permittivity of the vacuum, 8.85×10<sup>-12</sup> F·m<sup>-1</sup>; N<sub>D</sub> is the donor density, cm<sup>-3</sup>;  
9 A is the surface area of photoanode, cm<sup>2</sup>; E<sub>app</sub> is the applied potential, E<sub>FB</sub> is the flat  
10 band potential, V; k is Boltzmanns constant, 1.38×10<sup>-23</sup> F·m<sup>-1</sup>; T is absolute  
11 temperature, K. At room temperature, kT/e is the temperature dependent term 25 mV  
12 and can be ignored. the density of calculated carriers (N<sub>D</sub>) of C<sub>x</sub>N<sub>y</sub>/BiVO<sub>4</sub> reached  
13 10.9×10<sup>22</sup> cm<sup>-3</sup>, which is substantially higher than pristine BiVO<sub>4</sub> photoanode (N<sub>D</sub>=  
14 7.1×10<sup>22</sup> cm<sup>-3</sup>).

15

16

17

18

19

20

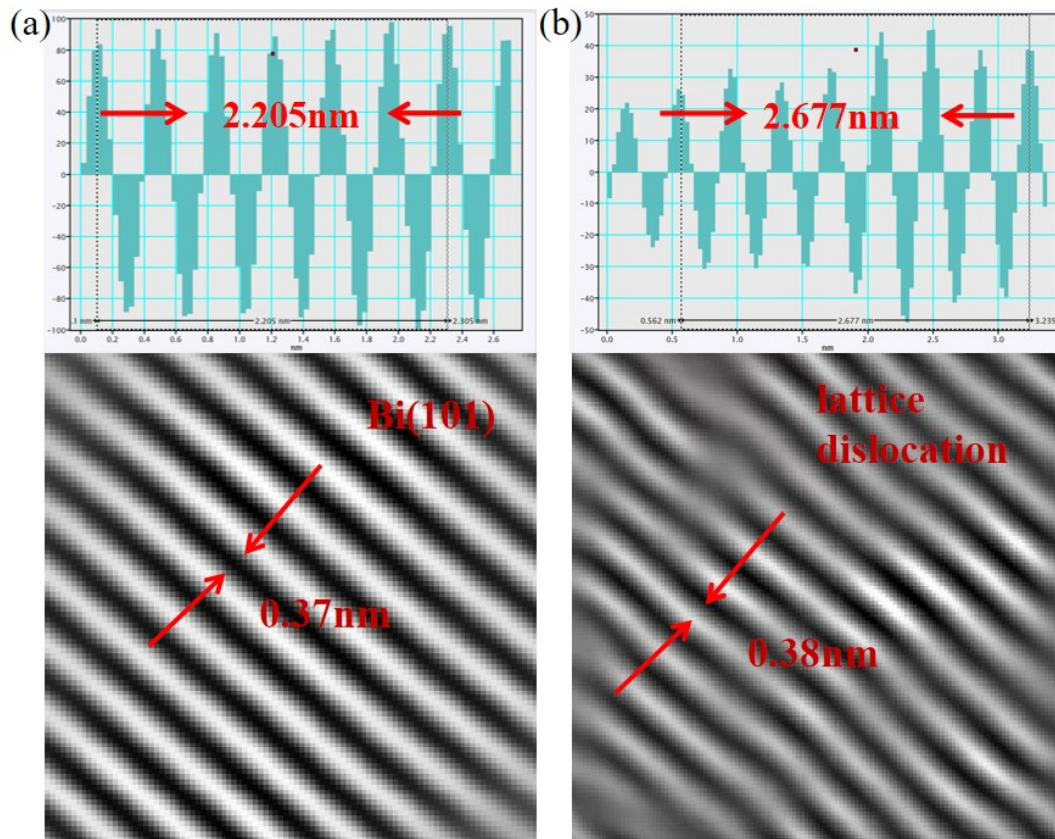

1

2 **Fig. S1** Lattice distance of HR-TEM image of (a) Bi and (b) lattice dislocation Bi

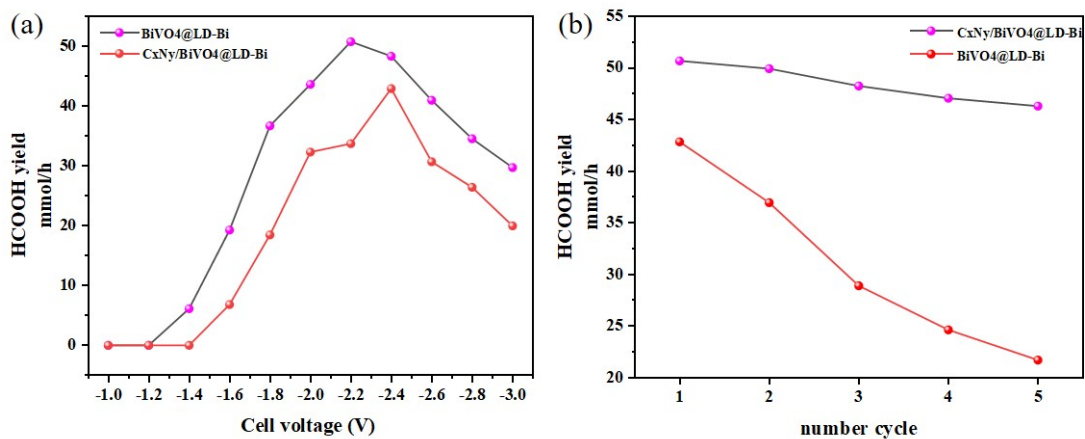

3

4 **Fig. S2** (a) HCOOH yield in BiVO<sub>4</sub>@LD-Bi system and C<sub>x</sub>N<sub>y</sub>/BiVO<sub>4</sub>@LD-Bi

5 system, (b) HCOOH yield corresponding to the number of cycles in BiVO<sub>4</sub>@LD-Bi

6 and BiVO<sub>4</sub>/C<sub>x</sub>N<sub>y</sub>@LD-Bi systems.

7

8

## 1 References

- 2 1. A. J. Rieth and D. G. Nocera, *Joule*, 2020, **4**, 2051-2055.
- 3 2. S. Ravishankar, J. Bisquert and T. Kirchartz, *Chemical Science*, 2022, **13**, 4828-
- 4 4837.
- 5
